# Supplementary material
Source: PubMed Central journal article supplement (PMC6937576)
Supplement: supp_RA119.011485_156471_2_supp_429715_q10963.pdf [file supp_RA119.011485_156471_2_supp_429715_q10963.pdf]

# **Yvci from *Bacillus subtilis* has *in vitro* RNA pyrophosphohydrolase activity**

Jens Frindert<sup>1</sup>, Masroor Ahmad Kahloon<sup>1</sup>, Yaqing Zhang<sup>1</sup>, Yasar Luqman Ahmed<sup>2</sup>, Irmgard Sinning<sup>2</sup>  
and Andres Jäschke<sup>1\*</sup>

<sup>1</sup>Institute of Pharmacy and Molecular Biotechnology (IPMB), Heidelberg University, D-69120  
Heidelberg, Germany

<sup>2</sup>Heidelberg University Biochemistry Center (BZH), Heidelberg University, D-69120 Heidelberg,  
Germany

## **Supporting Information**

Contains Supporting Methods, Supporting Figures 1-6 and Supporting Tables 1-4.

## SUPPORTING METHODS

### Plasmid construction

The genes of YvcI (*yvcI*), BsRppH (*rppH*), YjhB (*yjhB*), MutT (*mutT*), NudF (*nudF*) and YmaB (*ymaB*) were amplified from genomic DNA from *B. subtilis* 1A1 isolated using a published method (1). *Xba*I and *Xho*I restriction sites were introduced during PCR amplification using Q5 Hot Start High-Fidelity DNA Polymerase (New England Biolabs) with the primers Fwd-YvcI/Rev-YvcI, Fwd-BsRppH/Rev-BsRppH, Fwd-NudF/Rev-NudF and Fwd-YmaB/Rev-YmaB (Table S2). The amplified PCR products were treated with *Xba*I and *Xho*I (both Thermo Scientific) and cloned into pET-28a(+) (Novagen), resulting in the plasmids pET-28a-YvcI, pET-28a-BsRppH, pET-28a-NudF and pET-28a-YmaB. Due to solubility issues, YjhB and MutT were expressed as maltose binding protein fusions. *yjhB* and *mutT* amplified with the primers Fwd-YjhB/Rev-YjhB and Fwd-MutT/Rev-MutT were cloned into 2M-T (Addgene plasmid #29708; 2M-T was a gift from Scott Gradia) by ligation independent cloning (LIC). In brief, 1 µg 2M-T in 1× *Ssp*I buffer was treated with 10 U *Ssp*I at 37°C for 30 min. The linearized vector was gel purified and used for the LIC reaction: in separate reactions, 150 ng of the vector, or the insert(s), respectively, in 1× T4 DNA polymerase buffer plus 5 mM DTT and 2.5 mM dCTP (insert) or 2.5 mM dGTP (vector) were treated with 3 U T4 DNA polymerase at 22°C for 30 min. After heat inactivation at 75°C for 20 min, 2 µl (each) of the LICed insert and LICed vector were combined in 10 µl and incubated at 20°C for 10 min resulting in the plasmids 2M-T-YjhB and 2M-T-MutT. All mutants of YvcI were generated by site-directed mutagenesis as described in (2). The primer for the introduction of the respective mutations are listed in Table S2. The resulting linearized plasmids pET-28a-YvcI-E49A, -E49Q, -E52Q, -E53Q, -E49Q-E52Q, -E49Q-E52Q, -E52Q-E53Q, were ligated (T4 DNA ligase, Thermo Scientific). *E. coli* DH5α was used for subcloning. Following Sanger sequencing, all plasmids (Table S4) were transformed into *E. coli* BL21 Star (DE3) (Thermo Scientific).

### Protein expression and purification

The expression and affinity purification of YvcI (mutants), BsRppH and YmaB from *B. subtilis* and NudC from *E. coli* were performed as described (3,4). HisTrap buffer A (50 mM Tris-HCl pH7.5, 0.3 M NaCl, 5 mM MgSO<sub>4</sub>, 5 mM 2-mercaptoethanol, 5% glycerol, 5 mM imidazole, 1 tablet per 1 l complete EDTA-free protease inhibitor cocktail (Merck)) and HisTrap buffer B (HisTrap buffer A with 500 mM imidazole) were used. For the expression of YjhB, MutT and NudF from *B. subtilis*, *E. coli* BL21 Star (DE3) harboring the respective plasmid were induced between OD<sub>600</sub> 0.6-0.8 with 0.1 mM IPTG. The cells were chilled for 30 min at 4°C and incubated at 17°C for 17 h. The purification by affinity chromatography using HisTrap columns (GE Healthcare) was performed as described (3). Fractions containing the protein of interest were concentrated in a centrifugal filter (10 kDa MWCO,

Amicon, Merck) and the buffer exchanged to Buffer G (50 mM Tris-HCl pH7.5, 300 mM NaCl, 0.1 DTT). For further purification, size-exclusion chromatography was performed using a Superdex 200 10/300 GL column (GE Healthcare) in Buffer G. The purity of all proteins was analyzed by SDS-PAGE (Coomassie staining) and the concentration determined by a BCA protein assay (Thermo Scientific). All proteins were stored in 50% glycerol at  $-20^{\circ}\text{C}$ .

### **Gel electrophoresis**

Classical denaturing polyacrylamide gel electrophoresis (PAGE) (5) was used to separate RNA.

## SUPPORTING FIGURES

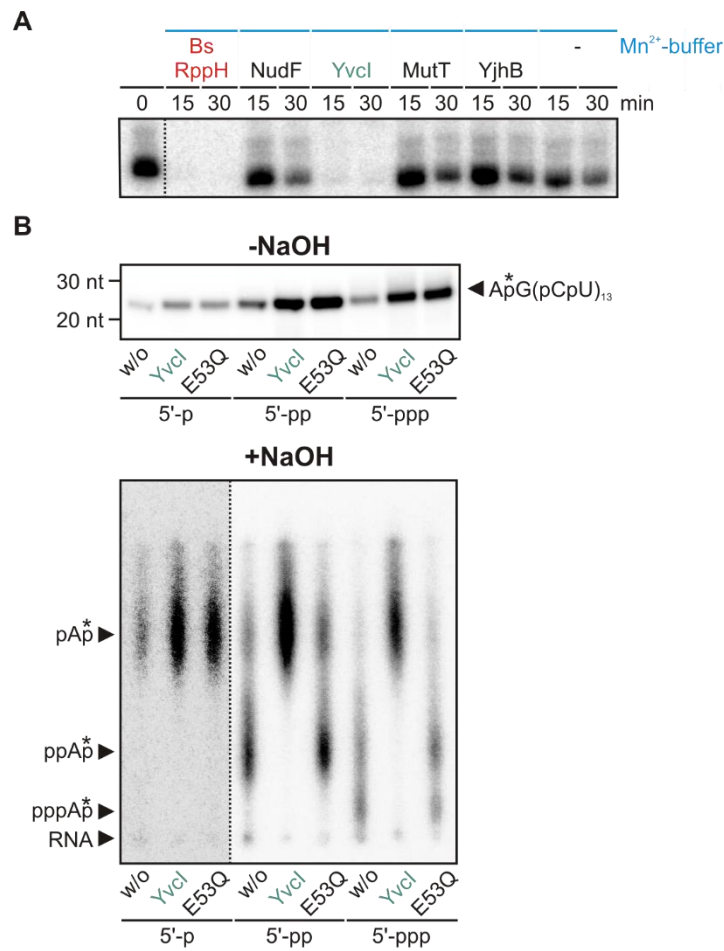

**Figure S1.** RNA pyrophosphohydrolase activity of Yvcl. **(A)** Yvcl and BsRppH efficiently remove phosphate from ppp-RNA in presence of Mn<sup>2+</sup>. ppp-*gapB* sRNA-like 5'-terminal fragment (75mer, 5'-labeled, 0.5 μM) was incubated with Nudix hydrolases (0.5 μM each) in 1× Mn-buffer (2 mM Mn<sup>2+</sup>). The dotted line indicates where different parts of the gel were combined to facilitate interpretation. 18% seqPAGE, phosphor imaging of radioactivity. **(B)** Conversion of 5'-ppp- and 5'-pp-RNA to 5'-p-RNA by Yvcl. p/p/p-RNA (p-, pp-, ppp-AG(CU)<sub>13</sub>, with the <sup>32</sup>P as part of the phosphate (\*) between the first and the second nucleotide) was incubated in absence (w/o) or presence of Yvcl, or Yvcl-E53Q, respectively (2 μM each) in 1× Mn-buffer (2 mM Mn<sup>2+</sup>). The reaction products were subjected to alkaline hydrolysis (lower part) or not (upper part). Analysis for samples hydrolyzed with sodium hydroxide by PEI-cellulose TLC and for non-hydrolyzed samples by 15% PAGE, phosphor imaging of radioactivity.

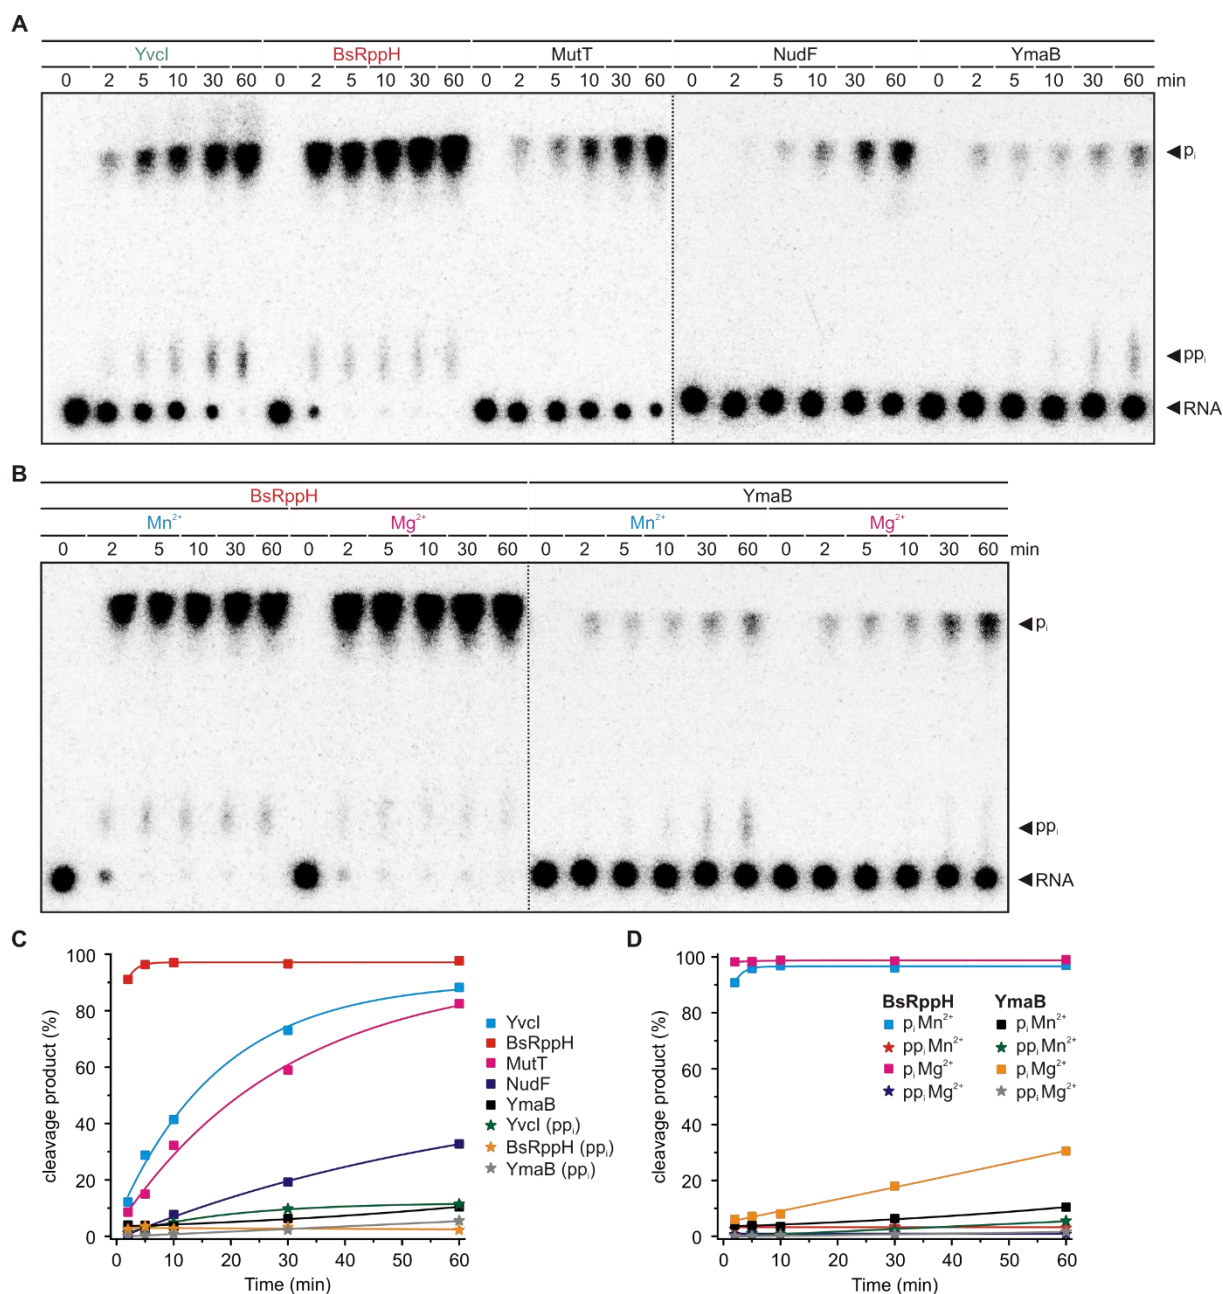

**Figure S2.** Comparison of the RNA pyrophosphohydrolase activity of *B. subtilis* Nudix hydrolases. **(A)** More Nudix hydrolases than BsRppH (6) show RNA pyrophosphohydrolase activity using manganese ( $Mn^{2+}$ ) as cofactor. ppp-RNA (AGU 5S rRNA, 5'-labeled, 0.5  $\mu M$ ) was incubated with YvcI, BsRppH, MutT, NudF, or YmaB (2  $\mu M$  each, 0.1  $\mu M$  for BsRppH) in 1 $\times$  Mn-buffer (2 mM  $Mn^{2+}$ ). PEI-cellulose TLC, phosphor imaging of radioactivity. **(B)** Comparison of the RNA pyrophosphohydrolase activity of BsRppH and YmaB. Procedure as for **(A)**. 1 $\times$  Mg-buffer or 1 $\times$  Mn-buffer (2 mM  $Mg^{2+}$  or  $Mn^{2+}$ ) were used as reaction buffer. **(C)** Quantification of the cleavage products from **(A)**. **(D)** Quantification of the cleavage products from **(B)**. The dotted lines indicate where different parts of the different plates were combined to facilitate interpretation.

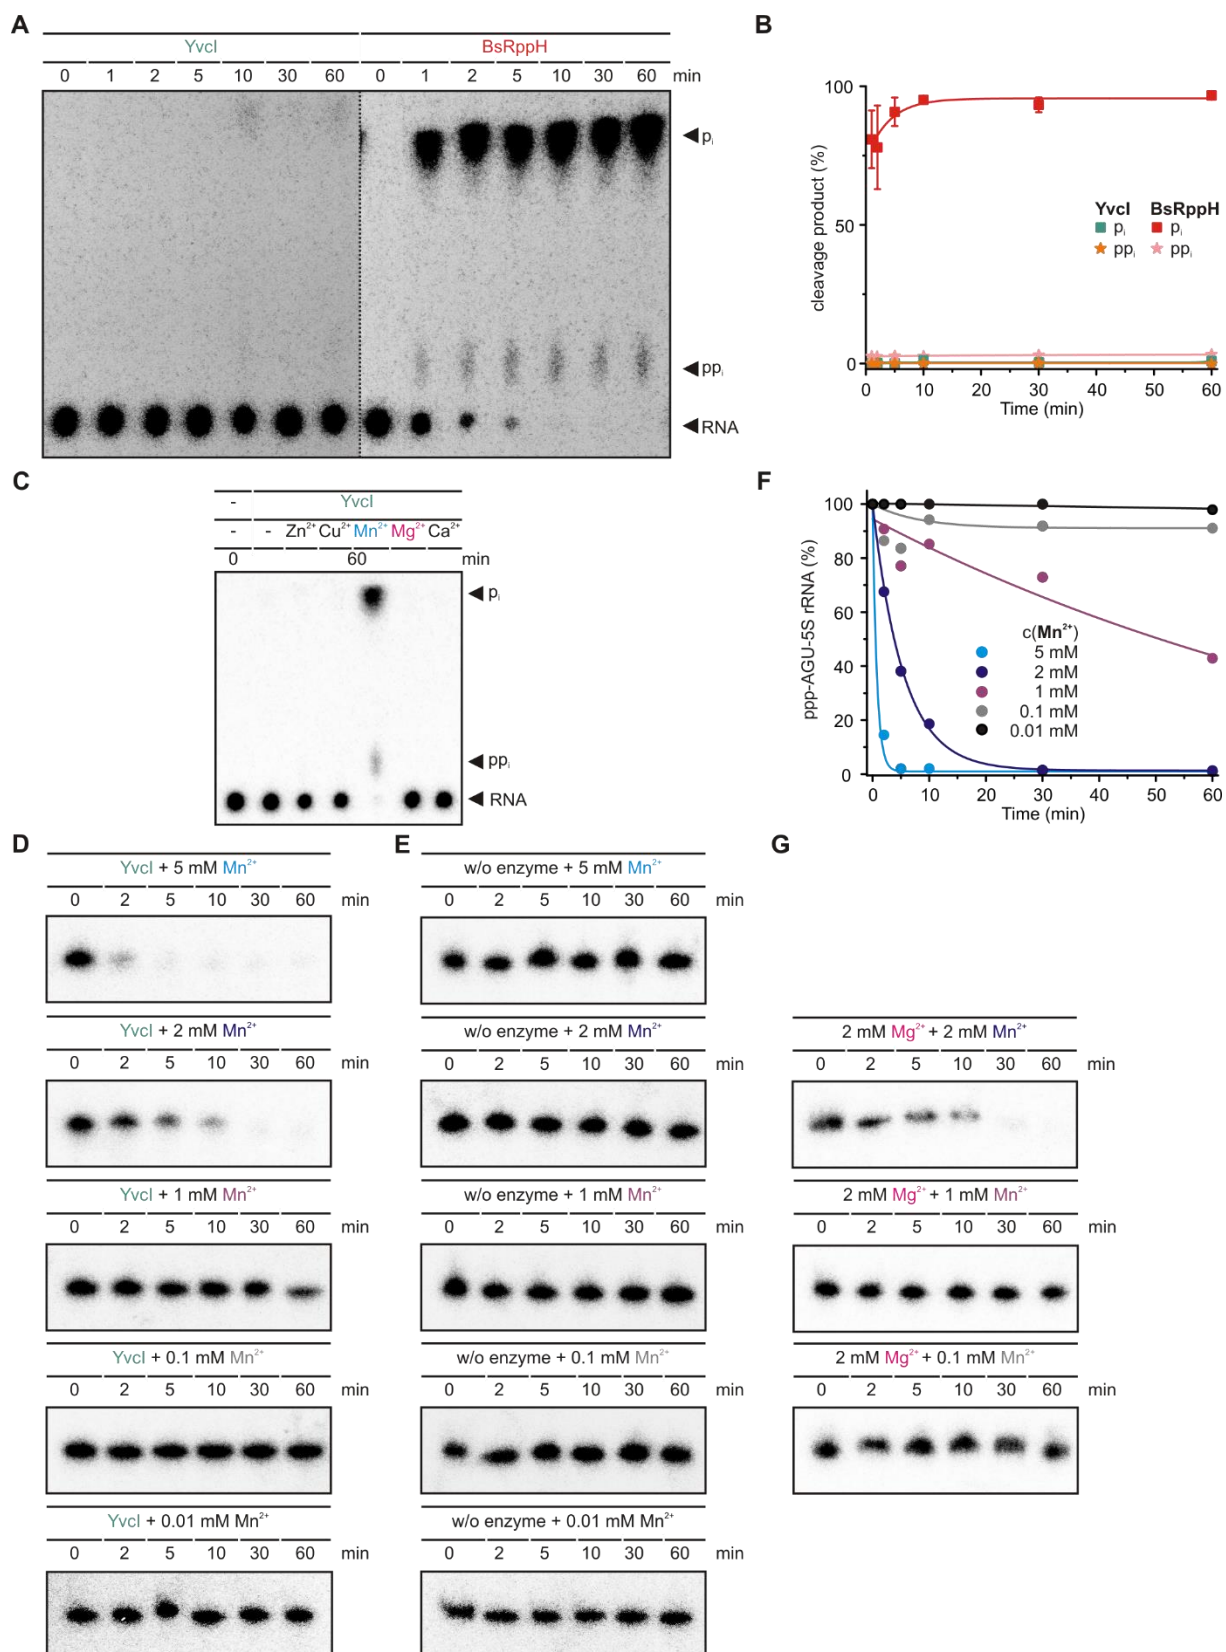

**Figure S3.** BsRppH is more active than Yvcl, which is only active in presence of manganese. **(A)** Comparison of the RNA pyrophosphohydrolase activity of Yvcl and BsRppH. ppp-RNA (AGU 5S rRNA, 5'-labeled, 0.5  $\mu$ M) was incubated with Yvcl or BsRppH (0.1  $\mu$ M each) in 1 $\times$  Mn-buffer (2 mM Mn<sup>2+</sup>). The dotted line indicates where different parts of different plates were combined to facilitate interpretation. PEI-cellulose TLC, phosphor imaging of radioactivity. **(B)** Quantification of the cleavage products from **(A)**, showing mean  $\pm$  standard deviation of three independent experiments (technical replicates). **(C)** Yvcl dephosphorylates ppp-RNA only in presence of manganese. ppp-RNA (AGU 5S rRNA, 5'-labeled, 0.5  $\mu$ M) was incubated with Yvcl (2  $\mu$ M). Mn<sup>2+</sup> was omitted (-) or exchanged by different divalent cations (Zn<sup>2+</sup>, Cu<sup>2+</sup>, Mg<sup>2+</sup>, Ca<sup>2+</sup>; 2 mM).

Analysis as for (A). (D, E) Yvcl requires 2 mM  $Mn^{2+}$  for efficient phosphate removal from ppp-RNA. ppp-RNA (AGU 5S rRNA, 5'-labeled, 0.5  $\mu$ M) was incubated with (D) or without (E) Yvcl (2  $\mu$ M) in 1 $\times$  Mn-buffer with 0, 0.01, 0.1, 1, 2, or 5 mM  $Mn^{2+}$ . 8% PAGE, phosphor imaging of radioactivity. (F) Quantification of the ppp-RNA from (D). (G) The presence of  $Mg^{2+}$  has no impact on the  $Mn^{2+}$ -dependent phosphate removal of ppp-RNA by Yvcl. Description as for (D) with the indicated cation concentrations. 8% PAGE, phosphor imaging of radioactivity.

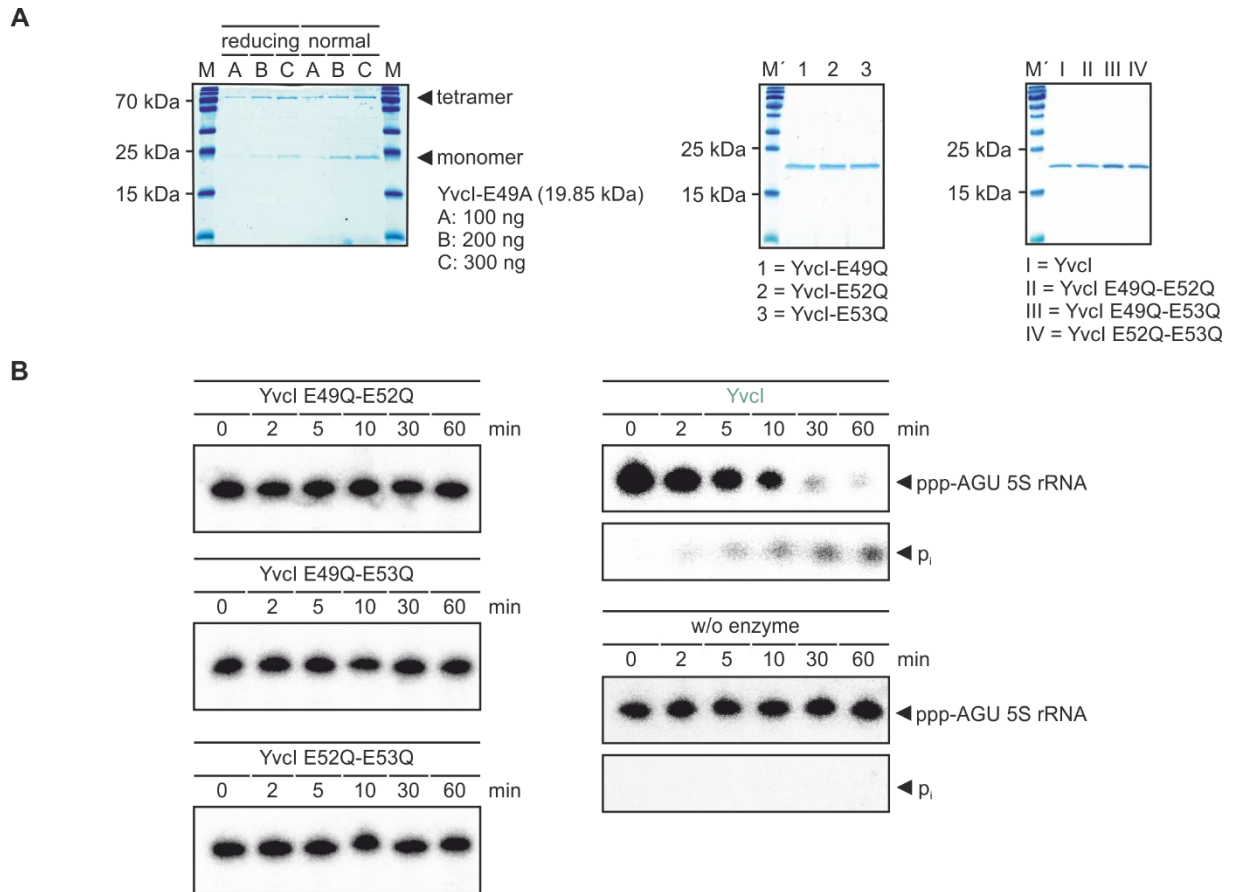

**Figure S4.** Yvcl mutants with amino acid exchanges in the Nudix motive have no or a reduced RNA pyrophosphohydrolase activity. **(A)** Expression and purification of Yvcl single and double mutants. The proteins were expressed in *E. coli* as His<sub>6</sub> fusions and purified by a combination of affinity and size exclusion chromatography. M, PageRuler Plus prestained protein ladder, M', PageRuler prestained protein ladder. 15% SDS-PAGE, Coomassie staining. **(B)** Two amino acid exchanges in the Nudix motif abolish the activity of Yvcl. ppp-RNA (AGU 5S rRNA, 5'-labeled, 0.5 μM) was incubated with Yvcl mutants, Yvcl (2 μM, each) or without any enzyme in 1× Mn-buffer (2 mM Mn<sup>2+</sup>). 8% PAGE, phosphor imaging of radioactivity.



**A**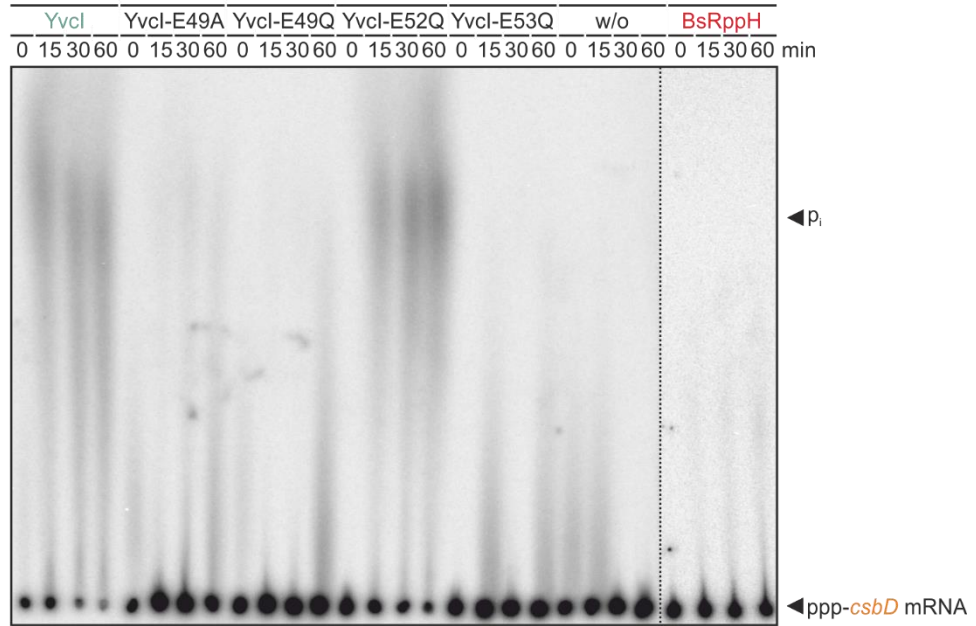**B**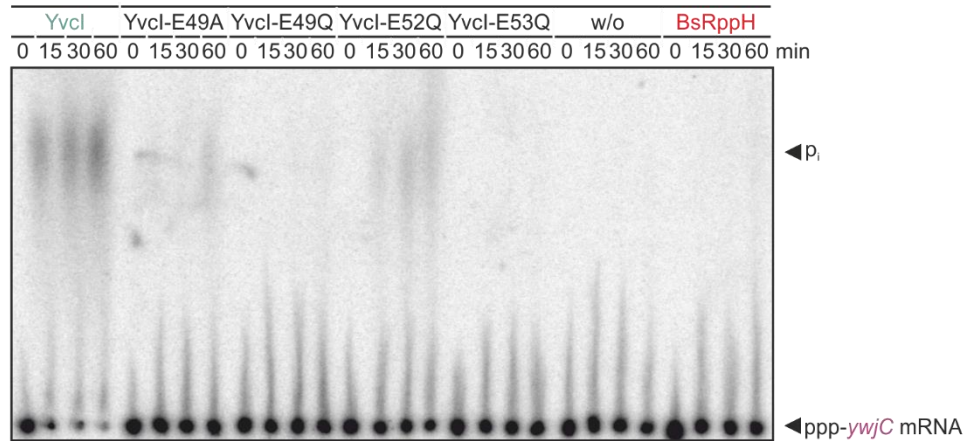

**Figure S5.** The Nudix motif of Yvcl is responsible for phosphate removal from ppp-RNA. **(A)** Yvcl mutants with amino acid exchanges in the Nudix motif were tested for their capability to remove phosphate from ppp-RNA. ppp-*csbD* mRNA (5'-labeled, 0.15  $\mu$ M) was incubated with Yvcl, Yvcl mutants (0.6  $\mu$ M each) or BsRppH (0.1  $\mu$ M) in 1 $\times$  Mn-buffer (2 mM Mn<sup>2+</sup>) (1 $\times$  Mg-buffer for BsRppH). The dotted line indicates where different parts of two plates were combined to facilitate interpretation. **(B)** Description as for **(A)**, but ppp-*ywjC* mRNA was used as RNA substrate. PEI-cellulose TLC, phosphor imaging of radioactivity.

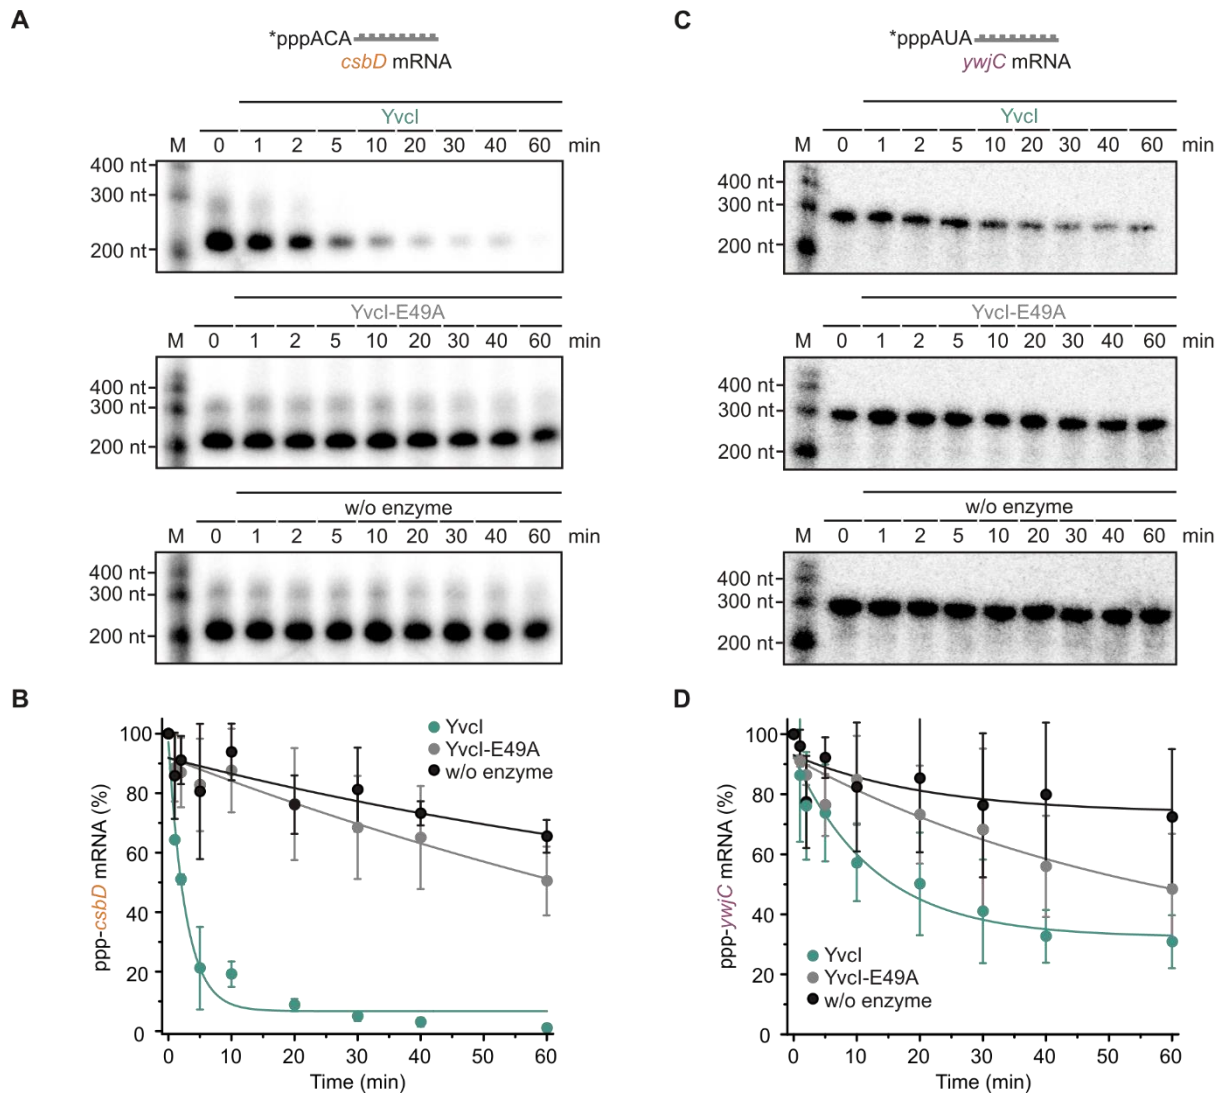

**Figure S6.** Yvcl removes phosphate of ppp-*csbD* and ppp-*ywjC* mRNA with different efficiencies. **(A)** Yvcl removes phosphate from ppp-*csbD* mRNA. Upper panel, scheme of ppp-*csbD* mRNA. An asterisk (\*) indicates  $^{32}\text{P}$ . ppp-*csbD* mRNA (5'-labeled, 0.25  $\mu\text{M}$ ) was incubated with Yvcl (1  $\mu\text{M}$ ), Yvcl-E49A (1  $\mu\text{M}$ ), or no enzyme, respectively, in 1 $\times$  Mn-buffer (2 mM  $\text{Mn}^{2+}$ ). 8% PAGE, phosphor imaging of radioactivity. **(B)** Quantification of the ppp-*csbD* mRNA from **(A)**, showing mean  $\pm$  standard deviation of three independent experiments (technical replicates). **(C)** Yvcl removes phosphate from ppp-*ywjC* mRNA. Upper panel, scheme of ppp-*ywjC* mRNA. Description as for **(A)**. 8% PAGE, phosphor imaging of radioactivity. **(D)** Quantification of the ppp-*ywjC* mRNA from **(C)**. Statistics are as in **(B)**.

## SUPPORTING TABLES

**Table S1.** Bacterial strains used in this work.

| Strain                                  | Relevant genotype                                                                                                                                               | Source/reference  |
|-----------------------------------------|-----------------------------------------------------------------------------------------------------------------------------------------------------------------|-------------------|
| <i>Bacillus subtilis</i> 1A1            | <i>trpC2</i>                                                                                                                                                    | BGSC, Ohio        |
| <i>Escherichia coli</i> BL21 Star (DE3) | <i>F ompT hsdS<sub>B</sub>(r<sub>B</sub><sup>-</sup> m<sub>B</sub><sup>-</sup>) gal dcm (DE3)</i>                                                               | Thermo Scientific |
| <i>Escherichia coli</i> DH5α            | <i>F endA1 glnV44 thi-1 recA1 relA1 gyrA96 deoR nupG purB20 φ80dlacZΔM15 Δ(lacZYA-argF)U169, hsdR17(r<sub>K</sub><sup>-</sup> m<sub>K</sub><sup>+</sup>), λ</i> | Thermo Scientific |

**Table S2.** Primer used for cloning and mutation of various genes from *B. subtilis*. “p”, phosphate, *Xba*I site, *Xho*I site, thrombin site.

| Name                 | Sequence (5'-to-3' direction)                                                             | Used for                                                                   |
|----------------------|-------------------------------------------------------------------------------------------|----------------------------------------------------------------------------|
| Fwd-YvcI             | TTCCCC <b>TCTAGA</b> AAATAATTTTGTTTAACTTTAAGAAGGAGATATAA<br>TGACGTA <b>CTT</b> GCAAAGAGTG | <i>yvcI</i> cloning                                                        |
| Rev-YvcI             | AGGATT <b>CTCGAGGCTGCCGCGCGGACCAG</b> TTTGATGTGCTGCGGG<br>TCTA                            |                                                                            |
| Fwd-BsRppH           | TTCCCC <b>TCTAGA</b> AAATAATTTTGTTTAACTTTAAGAAGGAGATATAA<br>TGTACGAGTTTAAAGATTATTATCAGAA  | <i>rppH</i> cloning                                                        |
| Rev-BsRppH           | AGGATT <b>CTCGAGGCTGCCGCGCGGACCAG</b> TTCAATCCATCCAGAT<br>TCTTTC                          |                                                                            |
| Fwd-NudF             | TTCCCC <b>TCTAGA</b> AAATAATTTTGTTTAACTTTAAGAAGGAGATATAA<br>TGAAATCATTAGAAGAAAAACAATTG    | <i>nudF</i> cloning                                                        |
| Rev-NudF             | AGGATT <b>CTCGAGGCTGCCGCGCGGACCAG</b> TTTTTGTGCTTGGAGC<br>GC                              |                                                                            |
| Fwd-YmaB             | TTCCCC <b>TCTAGA</b> AAATAATTTTGTTTAACTTTAAGAAGGAGATATAA<br>TGGGAAAAATGGACGAAATG          | <i>ymaB</i> cloning                                                        |
| Rev-YmaB             | AGGATT <b>CTCGAGGCTGCCGCGCGGACCAG</b> TTCAAGAATATCAACA<br>ACAAACTGTG                      |                                                                            |
| Fwd-YjhB             | TACTTCCAATCCAATGCAATAAAAAGTGCAAACCAAATGGCT                                                | <i>yjhB</i> cloning                                                        |
| Rev-YjhB             | TTATCCACTTCCAATGTTATTAGTCAAATATCGTTTCTTGTCGGG                                             |                                                                            |
| Fwd-MutT             | TACTTCCAATCCAATGCATATACACAAGGTGCTTTTGTGATC                                                | <i>mutT</i> cloning                                                        |
| Rev-MutT             | TTATCCACTTCCAATGTTATTACTTGCCAGTCTTCTTTTCAAC                                               |                                                                            |
| Fwd-YvcI-E49A        | p-CGTACAGAGAAGAGACTGGTATC                                                                 | <i>yvcI</i> mutation (E49A exchange)                                       |
| Rev-YvcI-E49A        | p-CTCTGATGACGGAGTCTCTGAC                                                                  |                                                                            |
| Fwd-YvcI-E49Q        | p-CAGTACAGAGAAGAGACTGGTATC                                                                | <i>yvcI</i> mutation (E49Q exchange)                                       |
| Rev-YvcI-E49Q        | p-TCTGATGACGGAGTCTCTGAC                                                                   |                                                                            |
| Fwd-YvcI-E52Q        | p-CAAGAGACTGGTATCTATATCATAAATCC                                                           | <i>yvcI</i> mutation (E52Q exchange)                                       |
| Rev-YvcI-E52Q        | p-TCTGTACTCTCTGATGACGG                                                                    |                                                                            |
| Fwd-YvcI-E53Q        | p-CAGACTGGTATCTATATCATAAATCC                                                              | <i>yvcI</i> mutation (E53Q exchange)                                       |
| Rev-YvcI-E53Q        | p-TTCTCTGTACTCTCTGATGAC                                                                   |                                                                            |
| Fwd-YvcI-E49Q-E52Q   | p-CAAGAGACTGGTATCTATATCATAAATCC                                                           | <i>yvcI</i> mutation (E49Q, E52Q exchange); pET-28a-YvcI-E49Q (template)   |
| Rev-YvcI-E49Q-E52Q   | p-TCTGTACTGTCTGATGACG                                                                     |                                                                            |
| Fwd-YvcI-E49Q-E52/3Q | p-CAGACTGGTATCTATATCATAAATCCTC                                                            | <i>yvcI</i> mutation (E49Q, E52/3Q exchange); pET-28a-YvcI-E49Q (template) |
| Rev-YvcI-E49Q-E53Q   | p-TTCTCTGTACTGTCTGATGAC                                                                   |                                                                            |
| Rev-YvcI-E52Q-E53Q   | p-TTGTCTGTACTCTCTGATGACG                                                                  | pET-28a-YvcI-E52Q (template)                                               |



**Table S4.** Plasmids used in this work.

| Name                        | Relevant fragment      | Used for                           | Reference/Supplier |
|-----------------------------|------------------------|------------------------------------|--------------------|
| pET His6 MBP TEV LIC (2M-T) | -                      | ligation independent cloning (LIC) | Addgene            |
| pET-28a(+)                  | -                      | general cloning                    | Novagen            |
| pET-28a-Yvcl                | <i>yvcl</i>            | expression of Yvcl                 | This work          |
| pET-28a-Yvcl-E49A           | <i>yvcl</i> -E49A      | expression of Yvcl-E49A            | This work          |
| pET-28a-Yvcl-E49Q           | <i>yvcl</i> -E49Q      | expression of Yvcl-E49Q            | This work          |
| pET-28a-Yvcl-E52Q           | <i>yvcl</i> -E52Q      | expression of Yvcl-E52Q            | This work          |
| pET-28a-Yvcl-E53Q           | <i>yvcl</i> -E53Q      | expression of Yvcl-E53Q            | This work          |
| pET-28a-Yvcl-E49Q-E52Q      | <i>yvcl</i> -E49Q-E52Q | expression of Yvcl-E49Q-E52Q       | This work          |
| pET-28a-Yvcl-E49Q-E53Q      | <i>yvcl</i> -E49Q-E53Q | expression of Yvcl-E49Q-E53Q       | This work          |
| pET-28a-Yvcl-E52Q-E53Q      | <i>yvcl</i> -E52Q-E53Q | expression of Yvcl-E52Q-E53Q       | This work          |
| pET-28a-BsRppH              | <i>rppH</i>            | expression of BsRppH               | (4)                |
| pET-28a-NudF                | <i>nudF</i>            | expression of NudF                 | This work          |
| pET-28a-YmaB                | <i>ymaB</i>            | expression of YmaB                 | This work          |
| 2M-T-YjhB                   | <i>yjhB</i>            | expression of YjhB                 | This work          |
| 2M-T-MutT                   | <i>mutT</i>            | expression of MutT                 | This work          |

## SUPPLEMENTARY REFERENCES

1. Looke, M., Kristjuhan, K. and Kristjuhan, A. (2011) Extraction of genomic DNA from yeasts for PCR-based applications. *BioTechniques*, **50**, 325-328.
2. Höfer, K., Li, S., Abele, F., Frindert, J., Schlotthauer, J., Grawenhoff, J., Du, J., Patel, D.J. and Jäschke, A. (2016) Structure and function of the bacterial decapping enzyme NudC. *Nat. Chem. Biol.*, **12**, 730-734.
3. Cahová, H., Winz, M.L., Höfer, K., Nübel, G. and Jäschke, A. (2015) NAD captureSeq indicates NAD as a bacterial cap for a subset of regulatory RNAs. *Nature*, **519**, 374-377.
4. Frindert, J., Zhang, Y.Q., Nübel, G., Kahloon, M., Kolmar, L., Hotz-Wagenblatt, A., Burhenne, J., Haefeli, W.E. and Jäschke, A. (2018) Identification, biosynthesis, and decapping of NAD-capped RNAs in *B. subtilis*. *Cell Rep.*, **24**, 1890-1901.
5. Rio, D.C., Ares, M., Jr., Hannon, G.J. and Nilsen, T.W. (2010) Polyacrylamide gel electrophoresis of RNA. *Cold Spring Harb. Protoc.*
6. Richards, J., Liu, Q.S., Pellegrini, O., Celesnik, H., Yao, S.Y., Bechhofer, D.H., Condon, C. and Belasco, J.G. (2011) An RNA pyrophosphohydrolase triggers 5'-exonucleolytic degradation of mRNA in *Bacillus subtilis*. *Mol. Cell*, **43**, 940-949.
